# Supplementary material for: The coffee ingredients caffeic acid and caffeic acid phenylethyl ester protect against irinotecan‐induced leukopenia and oxidative stress response
Source: PubMed Central journal article supplement — Br J Pharmacol. 2020 Jul 16;177(18):4193–208. doi: 10.1111/bph.15162 (PMC7443465; doi:10.1111/bph.15162), 2020-07-16
Supplement: BPH-177-4193-s001.pdf [file BPH-177-4193-s001.pdf]

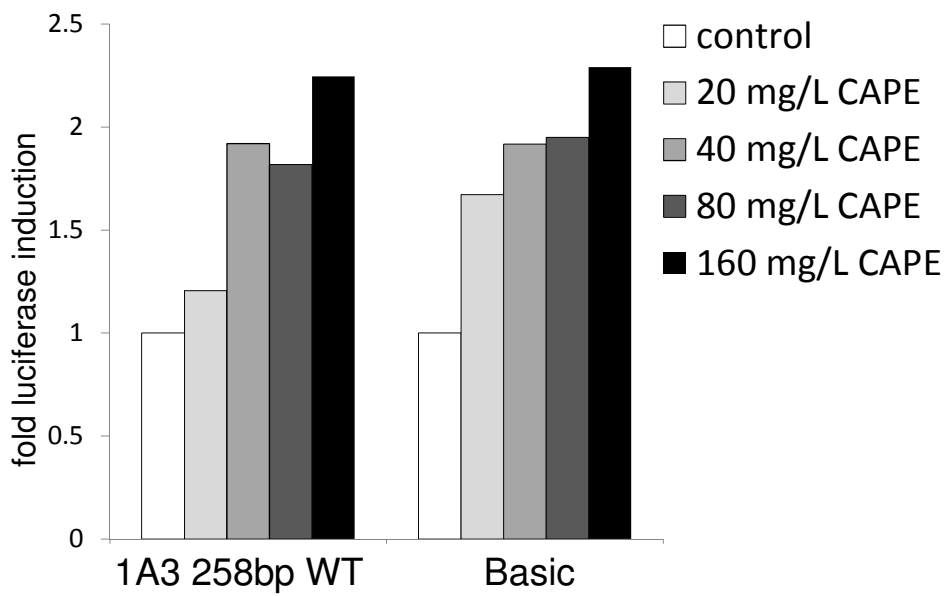

### Supplementary Figure 6

Increasing concentrations of CAPE were not able to induce UGT1A3 reporter gene expression significantly in comparison to Basic control vector in KYSE70 cells. The screen was performed in three independent experiments each analyzing three wells.
